# Supplementary material for: Enhanced photoelectrochemical performance by synthesizing CdS decorated reduced TiO2nanotube arrays
Source: Royal Society of Chemistry journal article supplement (doi:10.1039/c4cp02967d), 2014-09-29
Supplement: c4cp02967d1.pdf [file c4cp02967d1.pdf]

## Enhanced Photoelectrochemical Performance by Synthesizing CdS decorated Reduced-TiO<sub>2</sub> Nanotube arrays

Qian Zhang,<sup>a</sup> Ling Wang,<sup>a</sup> Jiangtao Feng,<sup>a</sup> Hao Xu<sup>a\*</sup> and Wei Yan<sup>a,b\*</sup>

*a. Department of Environmental Science and Engineering, Xi'an Jiaotong University,*

*Xi'an, 710049, China*

*b. The State Key Laboratory of Multiphase Flow in Power Engineering, Xi'an Jiaotong*

*University, Xi'an, 710049, China*

### Supplementary Information

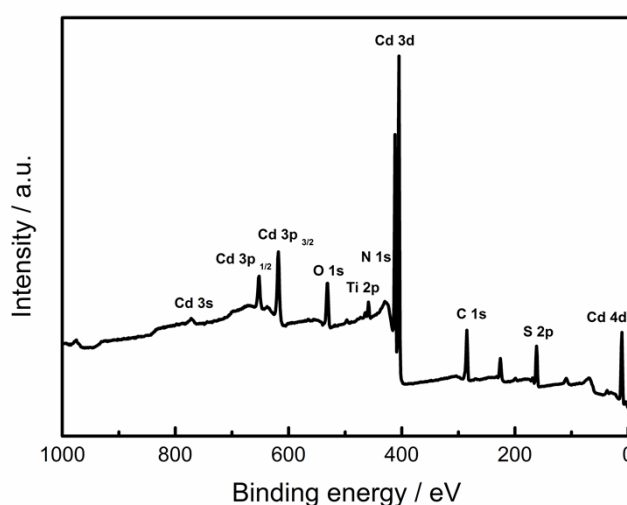

Figure S1 XPS survey spectrum of CdS/R-TiO<sub>2</sub> NTs.

---

<sup>a\*</sup> Corresponding author  
Email address: [xuhao@mail.xjtu.edu.cn](mailto:xuhao@mail.xjtu.edu.cn) (H Xu)  
<sup>a,b\*</sup> Corresponding author  
Tel: +86 029 82664731  
Email address: [yanwei@mail.xjtu.edu.cn](mailto:yanwei@mail.xjtu.edu.cn) (W Yan)

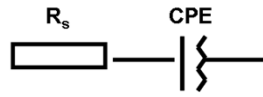

(a) RC model

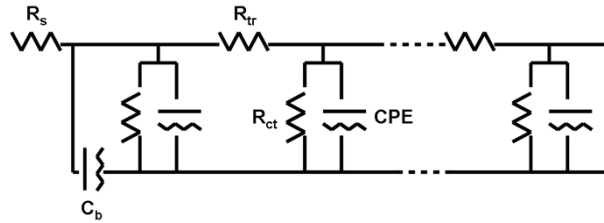

(b) Transmission line model

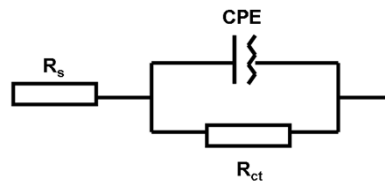

(c) Randles model

Figure S2 Impedance equivalent circuits

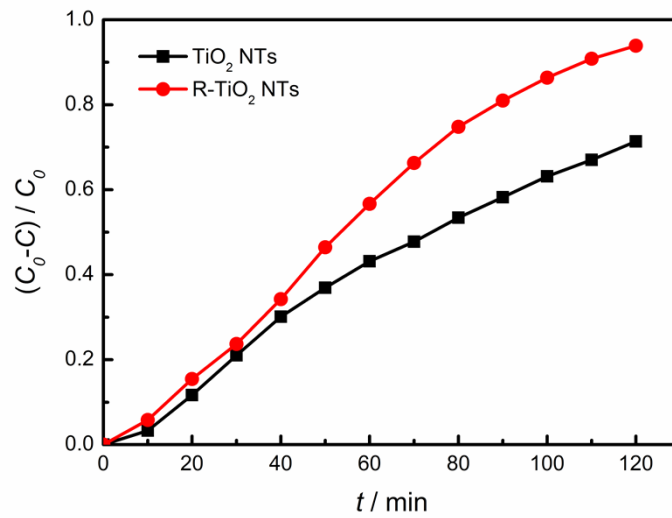

Figure S3 Photoelectrocatalytic activity evaluation of R-TiO<sub>2</sub> NTs by decomposition of salicylic acid. In the experimental setup, Pt and Ag/AgCl (3 M KCl) serve as counter and reference electrodes, respectively. 0.1 M Na<sub>2</sub>SO<sub>4</sub> was acting as supporting electrolyte, with 20 ppm salicylic acid as the starting concentration to degrade. A UV 375 nm LED light source at power density of 300 mW cm<sup>-2</sup> was shined on R-TiO<sub>2</sub> NTs surface. The change of salicylic acid concentration as a function of time was quantified by the UV-visible spectrometer at 297 nm.
